# Supplementary material
Source: publisher figshare collection journal article supplement (https://acs.figshare.com/ndownloader/files/13464629)
Supplement: Supplementary file 1 [file 13464629]

# **Delivery of doxorubicin using double layered core shell nanocarrier based on magnetic Fe<sub>3</sub>O<sub>4</sub> core and salep shells**

Seyed Hassan Hosseini<sup>\*†</sup>, Sakineh Alipour<sup>‡</sup>, Nasrin Zohreh<sup>\*‡</sup>

<sup>†</sup>*Department of Chemical Engineering, University of Science and Technology of Mazandaran, Behshahr, Iran*

<sup>‡</sup>*Department of Chemistry, Faculty of Science, University of Qom, Qom, Iran*

*Corresponding Authors: Dr. Seyed Hassan Hosseini, [s.h.hosseini@gmail.com](mailto:s.h.hosseini@gmail.com), [h.hosseini@mazust.ac.ir](mailto:h.hosseini@mazust.ac.ir); Dr. Nasrin*

*Zohreh, [Nasrin.zohreh@gmail.com](mailto:Nasrin.zohreh@gmail.com), Phone/fax: +982166165301*

| <b>Contents</b>                                 | <b>Page</b> |
|-------------------------------------------------|-------------|
| 1H NMR of salep and salep dialdehyde            | S1          |
| DLS analysis of MNP@CSa@HSa in different medium | S2          |

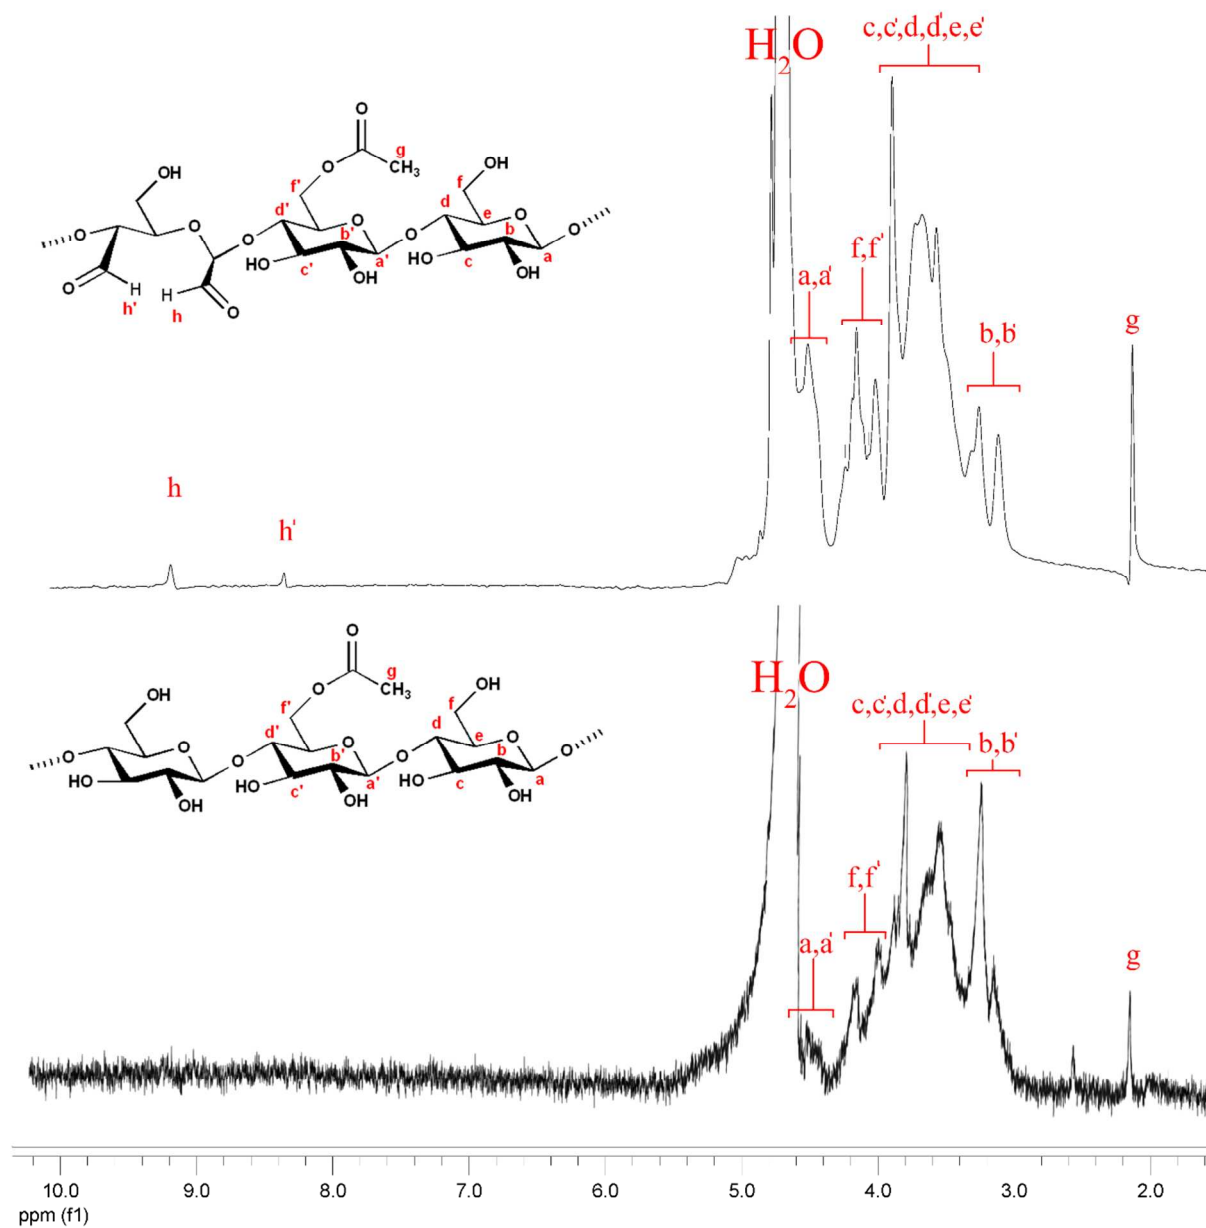

**Figure S1.**  $^1\text{H}$  NMR of salep and salep dialdehyde.

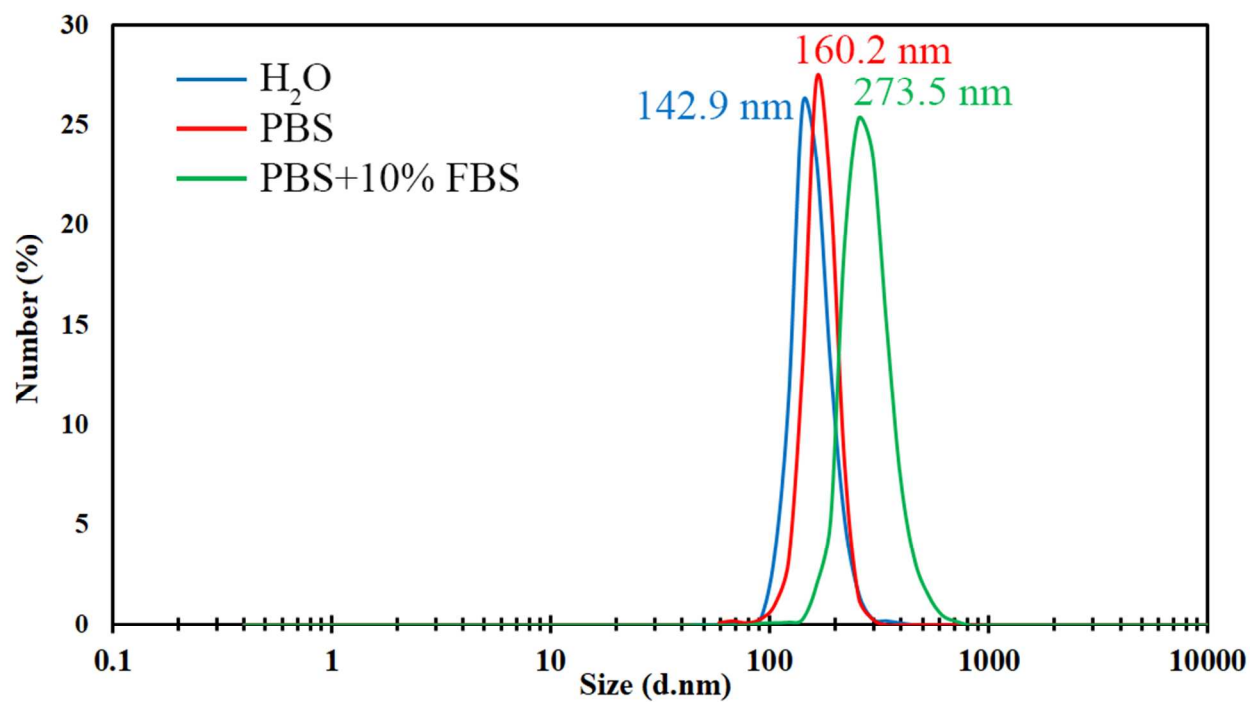

**Figure S2.** DLS analysis of MNP@CSa@HSa in water, PBS and PBS+10% FBS solutions.
